# Supplementary material for: Novel CIC Point Mutations and an Exon-Spanning, Homozygous Deletion Identified in Oligodendroglial Tumors by a Comprehensive Genomic Approach Including Transcriptome Sequencing
Source: PubMed Central journal article supplement (PMC3785522; doi:10.1371/journal.pone.0076623), 2013-09-27
Supplement: pone.0076623.s001.pdf [file pone.0076623.s001.pdf]

**Supplementary Table S1:** Clinical data and histology of patients from whom tumor material was analyzed

| Case ID | WHO classification | Sex | Age at diagnosis<br>in years | Survival in days* |
|---------|--------------------|-----|------------------------------|-------------------|
| BT1     | O III              | f   | 47                           | 2074              |
| BT2     | OA II              | f   | 29                           | 3728              |
| BT3     | O III              | m   | 63                           | 3209              |
| BT4     | O III              | f   | 51                           | 3318              |
| BT5     | O II               | f   | 40                           | 2623              |
| BT6     | OA III             | m   | 35                           | 1641              |
| BT7     | O III              | m   | 55                           | 72†               |
| BT8     | OA II              | m   | 41                           | 1729              |
| BT9     | OA II              | m   | 40                           | 1306              |
| BT10    | O III              | f   | 5                            | 5963              |
| BT11    | OA II              | f   | 34                           | 1139              |
| BT12    | OA III             | f   | 60                           | 818               |
| BT13    | OA II              | f   | 47                           | 1347              |
| BT14    | O III              | m   | 45                           | 1576              |
| BT15    | O II               | f   | 56                           | 3502†             |
| BT16    | O II               | m   | 43                           | 2373              |
| BT17    | OA II              | f   | 31                           | 2360              |

**Abbreviations:** O II = oligodendroglioma WHO grade II, O III = anaplastic oligodendroglioma WHO grade III, OA II = oligoastrocytoma WHO grade II, OA III = anaplastic oligoastrocytoma WHO grade III, m = male, f = female, \*survival in days from time of surgery to last follow up or death, † = patient died
