# Supplementary material for: Novel CIC Point Mutations and an Exon-Spanning, Homozygous Deletion Identified in Oligodendroglial Tumors by a Comprehensive Genomic Approach Including Transcriptome Sequencing
Source: PLoS One. 2013 Sep 27;8(9):e76623. doi: 10.1371/journal.pone.0076623 (PMC3785522; doi:10.1371/journal.pone.0076623)
Supplement: Table S3 — individual expression values of CIC and FUBP as well as the log2 ratios (array CGH) for all tumor samples analyzed. (XLSX) [file pone.0076623.s003.xlsx]

## Sheet: Tabelle1
Supplementary Table S3: individual expression values of CIC and FUBP as well as the log2 ratios (array CGH) for all tumor samples analyzed
	RNA-Seq (RPKM)				Agilent 8x60k expression array (normalized log2 expression values)					Array CGH (log2-ratios)
gene name	CIC	FUBP1	PAFAH1B3	PRR19	CIC	FUBP1	FUBP1	PAFAH1B3	PRR19	CIC	CIC	PAFAH1B3	FUBP1	FUBP1	FUBP1	FUBP1
Agilent probe-ID					A_23_P55731	A_23_P45699	A_33_P3281151	A_23_P16078	A_33_P3403107	A_14_P134420	A_16_P21013642	A_14_P124269	A_14_P108550	A_16_P00101813	A_16_P00101835	A_14_P116658
BT1	0.767	6.472	0.296	10.387	8.18948	8.03253	8.91352	7.22635	12.2289	-0.806	-2.043	-2.201	-0.774	-1.285	-1.282	-0.928
BT2	7.419	25.592	13.026	0.8	10.9232	9.04893	9.82389	11.3875	7.60406	-0.59	-0.789	-0.867	-0.643	-0.993	-0.985	-0.783
BT3	6.612	28.989	12.519	0.405	10.632	9.81942	10.3003	11.8304	8.3712	-0.165	-0.691	-0.34	-0.562	-0.715	-0.817	-0.332
BT4	11.761	14.067	14.628	0.562	10.6611	8.81696	9.03125	12.0077	8.00366	-0.28	-0.885	-0.813	-0.72	-1.048	-1.114	-0.828
BT5	11.528	12.798	15.52	0.833	11.1185	8.08627	8.74455	11.8295	7.93051	-0.047	-0.54	-0.457	-0.64	-0.947	-1.021	-0.836
BT6	13.25	12.192	6.281	0.685	11.4312	9.26083	10.0233	10.1381	6.70641	0.069	-0.196	-0.455	-0.306	-0.566	-0.454	-0.51
BT7	1.726	6.851	36.301	1.593	10.741	8.44635	8.96197	12.4882	9.3128	-0.309	-0.67	-0.732	-0.359	-0.949	-0.871	-0.774
BT8	15.739	21.242	16.281	0.918	n. a.	n. a.	n. a.	n. a.	n. a.	-0.386	0.024	-0.317	-0.135	-0.314	-0.409	-0.299
BT9	12.705	21.429	14.466	1.337	10.9986	9.82348	10.5824	11.3083	7.23221	-0.372	-0.409	-1.097	-0.242	-0.868	-0.949	-0.662
BT10	14.23	75.983	55.088	2.176	11.6277	11.2838	12.1844	13.8878	9.56955	0.031	-0.202	0.245	-0.004	-0.287	-0.195	-0.119
BT11	12.037	34.557	53.079	1.582	11.8708	10.2568	10.7223	13.0122	8.78574	0.472	0.255	-0.248	0.408	0.071	-0.116	0.142
BT12	12.657	32.665	15.812	1.35	11.5083	10.0275	10.7229	11.8291	8.27377	-0.346	-0.17	-0.275	0.205	0.36	0.064	-0.225
BT13	10.434	33.233	11.689	0.838	11.356	9.67023	10.1174	11.5305	8.67902	0.055	0.158	0.064	0.241	-0.246	-0.409	-0.047
BT14	n. a.	n. a.	n. a.	n. a.	n. a.	n. a.	n. a.	n. a.	n. a.	-0.65	-1.32	-0.36	-0.777	-1.285	-1.282	-0.928
BT15	n. a.	n. a.	n. a.	n. a.	11.1597	9.09999	9.48484	11.0931	7.41119	-1.364	-0.755	-0.414	-0.427	-0.75	-0.942	-0.376
BT16	n. a.	n. a.	n. a.	n. a.	n. a.	n. a.	n. a.	n. a.	n. a.	0.162	-0.157	-0.397	-0.169	-0.247	-0.352	0.003
BT17	n. a.	n. a.	n. a.	n. a.	n. a.	n. a.	n. a.	n. a.	n. a.	0.151	0.065	-0.097	0.625	-0.114	-0.072	0.33
nb1	29.374	20.828	31.765	1.514	12.5689	10.055	10.7701	13.1256	9.40513	n. a.	n. a.	n. a.	n. a.	n. a.	n. a.	n. a.
nb2	26.616	13.3	12.558	0.925	12.1626	9.82199	10.2291	12.0077	9.04497	n. a.	n. a.	n. a.	n. a.	n. a.	n. a.	n. a.
nb3	14.414	17.534	11.265	1.055	n. a.	n. a.	n. a.	n. a.	n. a.	n. a.	n. a.	n. a.	n. a.	n. a.	n. a.	n. a.
