# Supplementary material for: Novel CIC Point Mutations and an Exon-Spanning, Homozygous Deletion Identified in Oligodendroglial Tumors by a Comprehensive Genomic Approach Including Transcriptome Sequencing
Source: PLoS One. 2013 Sep 27;8(9):e76623. doi: 10.1371/journal.pone.0076623 (PMC3785522; doi:10.1371/journal.pone.0076623)
Supplement: Table S4 — CIC mutations reported in the literature and in the cohort analyzed in this study. (XLSX) [file pone.0076623.s004.xlsx]

## Sheet: Tabelle1
Supplementary Table S5: CIC mutations reported in the literature and in the cohort analyzed in this study
						loss of function mutations: nonsense, frameshift, splice site	Missense mutations with PolyPhen-2 score > 0.947 rated probably damaging, deletions in frame in Exons 5 and 20		Mutations assumed not to cause a loss of protein function: missense mutations with PolyPhen-2 score < 0.088 rated benign
Publication	Sample name	1p/19q status	IDH1/2 status	genomic position (HG18)	genomic position (HG19)	DNA sequence alteration	Codon change	Exon Position	PolyPhen-2 score	Mutation Taster	Mutation Assessor	Mutation type
Bettegowda et al. 2011 [1]	OLID09	LOH 1p/19q	IDH1 pos	g.chr19:47483555C>T		c.601C>T	p.R201W	Exon 5	1.000 (sensitivity: 0.00; specificity: 1.00)	Disease causing; model simple, prob: 0.999	Medium	Missense
Bettegowda et al. 2011 [1]	OLID10	LOH 1p/19q	IDH1 pos	g.chr19:47483592G>C		c.638G>C	p.R213P	Exon 5	1.000 (sensitivity: 0.00; specificity: 1.00)	Disease causing; model simple, prob: 0.999	Medium	Missense
Bettegowda et al. 2011 [1]	OLID12	LOH 1p/19q	IDH1 pos	g.chr19:47483598G>A		c.644G>A	p.R215Q	Exon 5	1.000 (sensitivity: 0.00; specificity: 1.00	Disease causing; model simple, prob: 0.999	Medium	Missense
Bettegowda et al. 2011 [1]	OLID08	LOH 1p/19q	IDH1 pos	g.chr19:47486574delGT		c.1814delGT	fs	Exon 10		Disease causing; model complex, prob: 1	N.A.	Deletion --> fs
Bettegowda et al. 2011 [1]	OLID15	1p ? LOH 19q	IDH1 pos	g.chr19:47487549G>A		IVS10-1G>A	Splice Acceptor	Exon 11 - 1 bp		N.A.	N.A.	splice acceptor
Bettegowda et al. 2011 [1]	OLID02	LOH 1p/19q	IDH1 pos	g.chr19:47490688G>T		c.4420G>T	p.V1474F	Exon 19	0.996 (sensitivity: 0.55; specificity: 0.98)	Disease causing; model simple, prob: 0.999	Low	Missense
Bettegowda et al. 2011 [1]	OLID 03PT	LOH 1p/19q	?	chr19:47485924insG		c.1445insG	fs	Exon 9		Disease causing; model complex, prob: 1	N.A.	Insertion --> fs
Bettegowda et al. 2011 [1]	OLID 23PT	ROH 1p/LOH 19q	?	chr19:47490903delAGA		c.4547delAGA	p.QK1517RD	Exon 20		Disease causing; model simple, prob: 0.999	N.A.	Deletion --> in frame
Bettegowda et al. 2011 [1]	OLID 42PT	LOH 1p/19q	?	chr19:47483711G>GA		c.757G>A	p.A253T	Exon 5	1.000 (sensitivity: 0.00; specificity: 1.00)	Disease causing; model simple, prob: 0.999	N.A.	Missense
Bettegowda et al. 2011 [1]	OLID 45PT	1p ? LOH 19q	?	chr19:47490722C>CT		c.4454C>T	p.P1485L	Exon 19	1.000 (sensitivity: 0.00; specificity: 1.00)	Disease causing; model simple, prob: 0.999	N.A.	Missense
Bettegowda et al. 2011 [1]	OLID 48PT	LOH 1p/19q	?	chr19:47483597C>CT		c.643C>T	p.R215W	Exon 5	1.000 (sensitivity: 0.00; specificity: 1.00)	Disease causing; model simple, prob: 0.999	N.A.	Missense
Bettegowda et al. 2011 [1]	OLID 50PT	LOH 1p/19q	?	chr19:47483438delC		c.579delC	fs	Exon 4		Disease causing; model complex, prob: 1	N.A.	Deletion --> fs
Bettegowda et al. 2011 [1]	OLID 55PT**	ROH 1p/LOH 19q	?	chr19:47483952G>GA		c.916G>A	p.A306T	Exon 6	0.948 (sensitivity: 0.79; specificity: 0.95)	Disease causing; model simple, prob: 0.733	N.A.	Missense
Bettegowda et al. 2011 [1]	OLID 59PT	1p ? LOH 19q	?	chr19:47490203delCGCAAGATGAGAAGACG		c.4234delCGCAAGATGAGAAGACG +	fs	Exon 18		N.A.	N.A.	Deletion --> fs
Bettegowda et al. 2011 [1]	OLID 60PT	1p ? LOH 19q	?	chr19:47483597C>CT		c.643C>T	p.R215W	Exon 5	1.000 (sensitivity: 0.00; specificity: 1.00)	Disease causing; model simple, prob: 0.999	N.A.	Missense
Bettegowda et al. 2011 [1]	OLID 61PT	1p ? LOH 19q	?	chr19:47483597C>CT		c.643C>T	p.R215W	Exon 5	1.000 (sensitivity: 0.00; specificity: 1.00)	Disease causing; model simple, prob: 0.999	N.A.	Missense
Bettegowda et al. 2011 [1]	OLID 63PT	1p ? LOH 19q	?	chr19:47483597C>T		c.643C>T	p.R215W	Exon 5	1.000 (sensitivity: 0.00; specificity: 1.00)	Disease causing; model simple, prob: 0.999	Medium	Missense
Bettegowda et al. 2011 [1]	OLID 65PT	1p ? LOH 19q	?	chr19:47490728G>GC		IVS4459+1	Splice Site	Exon 19+1bp		N.A.	N.A.	Splice site -->fs
Yip et al. 2012 [2]	HS1893	1p19q co-deleted (FISH)	IDH1 pos	47483801G>C		c.766-1G>C	Splice Acceptor	Exon 6-1bp		Disease causing; model simple, prob: 1	N.A.	Splice acceptor mutation
Yip et al. 2012 [2]	HS2040	1p19q co-deleted (FISH)	IDH1 pos	47483558_C>T		c.604 C > T	R202W	Exon 5	1.000 (sensitivity: 0.00; specificity: 1.00)	Disease causing; model simple, prob: 0.998	High	Missense
Yip et al. 2012 [2]	HS2042	1p19q co-deleted (FISH)	IDH1 pos	47486280_47486281insC			P509	Exon10		Disease causing; model complex, prob: 1	N.A.	Insertion --> fs
Yip et al. 2012 [2]	HS2805	1p19q co-deleted (FISH)	IDH1 pos	47483580_T>G		c.626 T > G	I209S	Exon 5	0.999 (sensitivity: 0.14; specificity: 0.99)	Disease causing; model simple, prob: 0.999	High	Missense
Yip et al. 2012 [2]	HS2045	1p19q co-deleted (FISH)	IDH2 pos	47490900_G>T		c.4544 G > T	R1515L	Exon 20	0.995 (sensitivity: 0.68; specificity: 0.97)	Disease causing; model simple, prob: 0.999	Low	Missense
Yip et al. 2012 [2]	HS2806	1p19q co-deleted (FISH)	IDH1 pos	47486863_47486864delAA				Exon 10		Disease causing; model complex, prob: 1	N.A.	Deletion --> fs
Yip et al. 2012 [2]	HS2807	1p19q co-deleted (FISH)	IDH1 pos	47483653_47483655delTCC			(P233)	Exon 5		Polymorphism; model complex, prob: 0.920	N.A.	Deletion
Yip et al. 2012 [2]	HS2810	1p19q co-deleted (FISH)	IDH1 pos	47483690_A>G		c.736 A > G	K246E	Exon 5	0.997 (sensitivity: 0.41; specificity: 0.98)	Disease causing; model simple, prob: 0.999	High	Missense
Yip et al. 2012 [2]	HS2812	1p19q co-deleted (FISH)	IDH1 pos	47488086_47488093insCTGACCC				Exon12		Disease causing; model complex, prob: 1	N.A.	Insertion --> fs
Yip et al. 2012 [2]	HS2813	1p19q co-deleted (FISH)	IDH1 pos	47488171_C>T		c.2980C>T	Q994*	Exon 12		Disease causing; model complex, prob: 1	N.A.	Nonsense
Yip et al. 2012 [2]	HS2814	1p19q co-deleted (FISH)	IDH2 pos	47490858insA			fs (F1501)	Exon 20		Disease causing; model complex, prob: 1	N.A.	Insertion --> fs
Yip et al. 2012 [2]	HS2814***	1p19q co-deleted (FISH)	IDH2 pos	47483100_G>A		(c.320G>A)	G107E	Exon 3	0.079 (sensitivity: 0.93; specificity: 0.85)	polymorphism; model simple, prob: 0.996	Neutral	Missense
Yip et al. 2012 [2]	HS2815	1p19q co-deleted (FISH)	IDH1 pos	47483598_G>A		c.644 G > A	R215Q	Exon 5	1.000 (sensitivity: 0.00; specificity: 1.00)	Disease causing; model simple, prob: 0.999	Medium	Missense
Yip et al. 2012 [2]	HS3124	1p19q co-deleted (FISH)	IDH1 pos	47490900_G>A		c.4544 G > A	R1515H	Exon 20	0.999 (sensitivity: 0.14; specificity: 0.99)	Disease causing; model simple, prob: 0.999	Low	Missense
Yip et al. 2012 [2]	TTB-297	1p19q co-deleted (FISH)	IDH1 pos				Q812*	Exon 10		N.A.	N.A.	Nonsense
Yip et al. 2012 [2]	TTB-467	LOH 19q only (PCR)	IDH1 pos				R1515H	Exon 20	0.999 (sensitivity: 0.14; specificity: 0.99)	N.A.	N.A.	Missense
Yip et al. 2012 [2]	TTB-517	1p19q co-deleted (FISH)	IDH1 pos	47490640delGCCATACTCCT				Exon 19		Disease causing; model complex, prob: 1	N.A.	Deletion --> fs
Yip et al. 2012 [2]	TTB-690	1p19q co-deleted (FISH)	IDH1 pos				N227D	Exon 5	0.997 (sensitivity: 0.41; specificity: 0.98)	N.A.	N.A.	Missense
Yip et al. 2012 [2]	SM-2220	1p19q co-deleted (FISH)	IDH1 pos				R201W	Exon 5	1.000 (sensitivity: 0.00; specificity: 1.00)	N.A.	N.A.	Missense
Yip et al. 2012 [2]	SM-2293	1p19q co-deleted (FISH)	IDH1 pos				R201W	Exon 5	1.000 (sensitivity: 0.00; specificity: 1.00)	N.A.	N.A.	Missense
Yip et al. 2012 [2]	1	LOH 1p/19q (PCR)	IDH1 pos			c.4550_4552delAGA		Exon 20		Disease causing; model simple, prob: 0.999	N.A.	Deletion
Yip et al. 2012 [2]	35	LOH 1p/19q (PCR)	IDH1 pos				S231N	Exon 5	0.997 (sensitivity: 0.41; specificity: 0.98)	N.A.	N.A.	Missense
Yip et al. 2012 [2]	37	LOH 1p/19q (PCR)	IDH1 pos				F207C	Exon 5	1.000 (sensitivity: 0.00; specificity: 1.00)	N.A.	N.A.	Missense
Yip et al. 2012 [2]	47	LOH 1p/19q (PCR)	IDH1 pos				M204I	Exon 5	0.963 (sensitivity: 0.78; specificity: 0.95)	N.A.	N.A.	Missense
Yip et al. 2012 [2]	61*	ROH 1p/19q (PCR)	WT				R1515C	Exon 20	1.000 (sensitivity: 0.00; specificity: 1.00)	N.A.	N.A.	Missense
Yip et al. 2012 [2]	79	LOH 1p/19q (PCR)	IDH1 pos				D226G	Exon 5	1.000 (sensitivity: 0.00; specificity: 1.00)	N.A.	N.A.	Missense
Yip et al. 2012 [2]	xT913	LOH 1p/19q (PCR)	IDH1 pos				R215W	Exon 5	1.000 (sensitivity: 0.00; specificity: 1.00)	N.A.	N.A.	Missense
Yip et al. 2012 [2]	xT1528	LOH 1p/19q (PCR)	IDH1 pos				R215Q	Exon 5	1.000 (sensitivity: 0.00; specificity: 1.00)	N.A.	N.A.	Missense
Yip et al. 2012 [2]	xT2690	LOH 1p/19q (PCR)	IDH1 pos				R201W	Exon 5	1.000 (sensitivity: 0.00; specificity: 1.00)	N.A.	N.A.	Missense
Yip et al. 2012 [2]	xT3390	LOH 1p/19q (PCR)	IDH1 pos				A253T	Exon 5	1.000 (sensitivity: 0.00; specificity: 1.00)	N.A.	N.A.	Missense
Yip et al. 2012 [2]	305	LOH 1p/19q (PCR)	IDH1 pos	47483653_47483655delTCC		(P233)		Exon 5		Polymorphism; model simple, prob: 0.992	N.A.	Deletion
Yip et al. 2012 [2]	SBT525	LOH 1p/19q (PCR)	IDH1 pos				Y239D	Exon 5	0.999 (sensitivity: 0.14; specificity: 0.99)	N.A.	N.A.	Missense
Yip et al. 2012 [2]	SBT526	LOH 1p/19q (PCR)	IDH1 pos				N205D	Exon 5	0.997 (sensitivity: 0.41; specificity: 0.98)	N.A.	N.A.	Missense
Yip et al. 2012 [2]	SBT528	LOH 1p/19q (PCR)	IDH1 pos				R215W	Exon 5	1.000 (sensitivity: 0.00; specificity: 1.00)	N.A.	N.A.	Missense
Yip et al. 2012 [2]	SBT529	LOH 1p/19q (PCR)	IDH1 pos				R215Q	Exon 5	1.000 (sensitivity: 0.00; specificity: 1.00)	N.A.	N.A.	Missense
Sahm et al. 2012 [3]	1	LOH 1p/19q (MLPA)	IDH1 pos			c.4550-4552delAGA	KI1517-1518I	Exon 20		Disease causing; model simple, prob: 0.999	N.A.	Deletion
Sahm et al. 2012 [3]	2	LOH 1p/19q (MLPA)	IDH1 pos			c.601C>T	R201W	Exon 5	1.000 (sensitivity: 0.00; specificity: 1.00)	Disease causing; model simple, prob: 1	N.A.	Missense
Sahm et al. 2012 [3]	3	LOH 1p/19q (MLPA)	IDH1 pos			c.601C>T	R201W	Exon 5	1.000 (sensitivity: 0.00; specificity: 1.00)	Disease causing; model simple, prob: 1	N.A.	Missense
Sahm et al. 2012 [3]	4	LOH 1p/19q (MLPA)	IDH1 pos			Exon1 del 88bp		Exon 1		N.A.	N.A.	Frameshift
Sahm et al. 2012 [3]	5	LOH 1p/19q (MLPA)	IDH1 pos			c.3045insC	L1015>1150X	Exon 13		Disease causing; model complex, prob: 1	N.A.	Frameshift
Sahm et al. 2012 [3]	6	LOH 1p/19q (MLPA)	IDH1 pos			c.453-2 a>t		Exon 4-2bp		Disease causing; model without, prob: 1	N.A.	Splice acceptor mutation
Sahm et al. 2012 [3]	7	LOH 1p/19q (MLPA)	IDH1 pos			c.682C>T	R228W	Exon 5	1.000 (sensitivity: 0.00; specificity: 1.00)	Disease causing; model simple, prob: 1	N.A.	Missense
Sahm et al. 2012 [3]	10	LOH 1p/19q (MLPA)	IDH1 pos			c.877A>T	K293X	Exon 6		Disease causing; model complex, prob: 1	N.A.	Nonsense
Sahm et al. 2012 [3]	11	LOH 1p/19q (MLPA)	IDH1 pos			c.613A>C	N205H	Exon 5	0.999 (sensitivity: 0.14; specificity: 0.99)	Disease causing; model simple, prob: 0.999	N.A.	Missense
Sahm et al. 2012 [3]	12	LOH 1p/19q (MLPA)	IDH1 pos			c.4131-4156del26bp	Q1377>1431X	Exon 17		N.A.	N.A.	Frameshift
Sahm et al. 2012 [3]	13	LOH 1p/19q (MLPA)	IDH1 pos			c.768-770delGAA	VK256-257V	Exon 5/6		Disease causing; model simple, prob: 0.999	N.A.	Deletion
Sahm et al. 2012 [3]	14	LOH 1p/19q (MLPA)	IDH1 pos			c.2904insCCCC	P968>1151X	Exon 12		Disease causing; model complex, prob: 1	N.A.	Frameshift
Sahm et al. 2012 [3]	15	LOH 1p/19q (MLPA)	IDH1 pos			c.1795delC	R599>727X	Exon 10		Disease causing; model complex, prob: 1	N.A.	Frameshift
Sahm et al. 2012 [3]	16	LOH 1p/19q (MLPA)	IDH1 pos			c.619T>A	F207I	Exon 5	0.999 (sensitivity: 0.14; specificity: 0.99)	Disease causing; model simple, prob: 0.680	N.A.	Missense
Sahm et al. 2012 [3]	17	LOH 1p/19q (MLPA)	IDH1 pos			c.2719C>T	Q907X	Exon 11		Disease causing; model complex, prob: 1	N.A.	Nonsense
Sahm et al. 2012 [3]	19	LOH 1p/19q (MLPA)	IDH1 pos			c.643C>T	R215W	Exon 5	1.000 (sensitivity: 0.00; specificity: 1.00)	Disease causing; model simple, prob: 0.999	N.A.	Missense
Sahm et al. 2012 [3]	20	LOH 1p/19q (MLPA)	IDH1 pos			c.644G>A	R215Q	Exon 5	1.000 (sensitivity: 0.00; specificity: 1.00)	Disease causing; model simple, prob: 0.999	N.A.	Missense
Sahm et al. 2012 [3]	21***	ROH 1p/19q (MLPA)	IDH1 pos			c.346G>T	V116L	Exon 3	0.000 (sensitivity: 1.00; specificity: 0.00)	Polymorphism; model simple, prob: 0.894	N.A.	Missense
Sahm et al. 2012 [3]	22	LOH 1p/19q (MLPA)	IDH1 pos			c.644G>T	R215Q	Exon 5	1.000 (sensitivity: 0.00; specificity: 1.00)	Disease causing; model simple, prob: 0.999	N.A.	Missense
Sahm et al. 2012 [3]	23	LOH 1p/19q (MLPA)	IDH1 pos			c.605G>A	R202Q	Exon 5	1.000 (sensitivity: 0.00; specificity: 1.00)	Disease causing; model simple, prob: 0.999	N.A.	Missense
Sahm et al. 2012 [3]	24	LOH 1p/19q (MLPA)	IDH1 pos			c.716A>G	Y239C	Exon 5	1.000 (sensitivity: 0.00; specificity: 1.00)	Disease causing; model simple, probl 0.999	N.A.	Missense
Sahm et al. 2012 [3]	35	LOH 1p/19q (MLPA)	IDH1 pos			c.4135-4136delCT	L1379>1439X	Exon 17		Disease causing; model complex, prob: 1	N.A.	Frameshift
Sahm et al. 2012 [3]	36	LOH 1p/19q (MLPA)	IDH2 pos			c.677A>G	D226G	Exon 5	1.000 (sensitivity: 0.00; specificity: 1.00)	Disease causing; model simple, prob: 0.990	N.A.	Missense
Sahm et al. 2012 [3]	37	LOH 1p/19q (MLPA)	IDH1 pos			c.2111-2112delCA	T704>709X	Exon 10		Disease causing; model complex, prob: 1	N.A.	Frameshift
Sahm et al. 2012 [3]	38	LOH 1p/19q (MLPA)	IDH1 pos			c.3365-3366delTG	V1122>1149X	Exon 14		Disease causing; model complex, prob: 1	N.A.	Frameshift
Sahm et al. 2012 [3]	39	LOH 1p/19q (MLPA)	IDH1 pos			c.278insGAGTGCTG	D93>207X	Exon 3		Disease causing; model complex, prob: 1	N.A.	Frameshift
Sahm et al. 2012 [3]	40	LOH 1p/19q (MLPA)	IDH1 pos			c.1804-1814delAGACCCGAAAG	R602>685X	Exon 10		Disease causing; model complex, prob: 1	N.A.	Frameshift
Sahm et al. 2012 [3]	41	LOH 1p/19q (MLPA)	IDH1 pos			c.633C>G	S211R	Exon 5	0.999 (sensitivity: 0.14; specificity: 0.99)	Disease causing; model simple, prob: 0.999	N.A.	Missense
Sahm et al. 2012 [3]	42	LOH 1p/19q (MLPA)	IDH1 pos			c.682C>G	R228G	Exon 5	1.000 (sensitivity: 0.00; specificity: 1.00)	Disease causing; model simple, prob: 0.999	N.A.	Missense
Sahm et al. 2012 [3]	61	LOH 1p/19q (MLPA)	IDH1 pos			c.1106-1109delAGAG	D369>375X	Exon 7		Disease causing; model complex, prob: 1	N.A.	Frameshift
Sahm et al. 2012 [3]	62	LOH 1p/19q (MLPA)	IDH1 pos			c.3348insC	P1116>1150X	Exon 14		Disease causing; model complex, prob: 1	N.A.	Frameshift
Sahm et al. 2012 [3]	64	LOH 1p/19q (MLPA)	IDH1 pos			c.611T>C	M204T	Exon 5	0.985 (sensitivity: 0.74; specificity: 0.96)	Disease causing; model simple, prob: 0.999	N.A.	Missense
Sahm et al. 2012 [3]	64	LOH 1p/19q (MLPA)	IDH1 pos			c.1740insG	G580>K689X	Exon 10		Disease causing; model complex, prob: 1	N.A.	Frameshift
Jiao et al. 2012 [4]	O III-2	?	IDH pos	g.chr19:47482765_47482766delTG(hom)				Exon 2		Disease causing; model complex, prob: 1	N.A.	Frameshift
Jiao et al. 2012 [4]	O III-7	?	IDH pos	g.chr19:47482849_47482850insC				Exon 2		Disease causing; model complex, prob: 1	N.A.	Frameshift
Jiao et al. 2012 [4]	O III-3	?	IDH pos	g.chr19:47483213_47483214delGA(hom)				Exon 3		Disease causing; model complex, prob: 1	N.A.	Frameshift
Jiao et al. 2012 [4]	O III-5	?	IDH pos	g.chr19:47483555C>T(hom)			R201W	Exon 5	1.000 (sensitivity: 0.00; specificity: 1.00)	Disease causing; model simple, prob: 0.999	Medium	Missense
Jiao et al. 2012 [4]	O III-17	?	IDH pos	g.chr19:47483555C>T(hom)			R201W	Exon 5	1.000 (sensitivity: 0.00; specificity: 1.00)	Disease causing; model simple, prob: 0.999	Medium	Missense
Jiao et al. 2012 [4]	O II-6	?	IDH pos	g.chr19:47483558C>T(hom)			R202W	Exon 5	1.000 (sensitivity: 0.00; specificity: 1.00)	Disease causing; model simple, prob: 0.998	High	Missense
Jiao et al. 2012 [4]	O III-18	?	IDH pos	g.chr19:47483592G>C(hom)			R213P	Exon 5	1.000 (sensitivity: 0.00; specificity: 1.00)	Disease causing; model simple, prob: 0.999	Medium	Missense
Jiao et al. 2012 [4]	O III-19	?	IDH pos	g.chr19:47483598G>A			R215Q	Exon 5	1.000 (sensitivity: 0.00; specificity: 1.00)	Disease causing; model simple, prob: 0.999	Medium	Missense
Jiao et al. 2012 [4]	O III-10	?	IDH pos	g.chr19:47483630G>T(hom)			D226Y	Exon 5	1.000 (sensitivity: 0.00; specificity: 1.00)	Disease causing; model simple, prob: 0.999	Medium	Missense
Jiao et al. 2012 [4]	O II-5	?	IDH pos	g.chr19:47483658G>A			G235D	Exon 5	1.000 (sensitivity: 0.00; specificity: 1.00)	Disease causing; model simple, prob: 0.999	High	Missense
Jiao et al. 2012 [4]	M IV-3**	?	IDH pos	g.chr19:47485356C>T			R440C	Exon 8	1.000 (sensitivity: 0.00; specificity: 1.00)	Disease causing; model simple, prob: 0.999	Neutral	Missense
Jiao et al. 2012 [4]	O III-14	?	IDH pos	g.chr19:47485924_47485925insG				Exon 9		Disease causing; model complex, prob: 1	N.A.	Frameshift
Jiao et al. 2012 [4]	GBM IV-7	?	IDH pos	g.chr19:47486450C>T(hom)			Q564X	Exon 10		Disease causing; model complex, prob: 1	N.A.	Nonsense
Jiao et al. 2012 [4]	O III-16	?	IDH pos	g.chr19:47486575_47486576delTG(hom)				Exon 10		Disease causing; model complex, prob: 1	N.A.	Frameshift
Jiao et al. 2012 [4]	O III-4	?	IDH pos	47486736_47486752delCCCCAGCAGCTCCCCTG				Exon 10		N.A.	N.A.	Frameshift
Jiao et al. 2012 [4]	O II-8	?	IDH pos	47487082_47487083insCCCCCTG				Exon 10		Disease causing; model complex, prob: 1	N.A.	Frameshift
Jiao et al. 2012 [4]	O II-15	?	IDH pos	47487082_47487083insCCCCCTG				Exon 10		Disease causing; model complex, prob: 1	N.A.	Frameshift
Jiao et al. 2012 [4]	OA III-4	?	IDH pos	47487095C>T			Q779X	Exon 10		Disease causing; model complex, prob: 1	N.A.	Nonsense
Jiao et al. 2012 [4]	O II-13	?	IDH pos	47487319_47487323delCAGCG				Exon 10		Disease causing; model complex, prob: 1	N.A.	Frameshift
Jiao et al. 2012 [4]	O III-21	?	IDH pos	47487549G>A				Exon 11-1bp		Disease causing; model simple, prob: 0.629	N.A.	Splice site --> fs
Jiao et al. 2012 [4]	O II-2	?	IDH pos	47487580_47487581insGC				Exon 11		Disease causing; model complex, prob: 1	N.A.	Frameshift
Jiao et al. 2012 [4]	O II-4	?	IDH pos	47488077G>A				Exon 12-1bp		Disease causing; model without, prob: 1	N.A.	Splice site --> fs
Jiao et al. 2012 [4]	OA II-2	?	IDH pos	47489118C>T			p.R1214X	Exon 15		Disease causing; model complex, prob: 0.999	N.A.	Nonsense
Jiao et al. 2012 [4]	OA III-2	?	IDH pos	47489221delC				Exon 15		Disease causing; model complex, prob: 1	N.A.	Frameshift
Jiao et al. 2012 [4]	O III-6	?	IDH pos	47489795delC				Exon 16		Disease causing; model complex, prob: 1	N.A.	Frameshift
Jiao et al. 2012 [4]	O III-11	?	IDH pos	47489819_47489820delCT				Exon 16		Disease causing; model complex, prob: 1	N.A.	Frameshift
Jiao et al. 2012 [4]	M IV-1	?	IDH pos	47490170G>C			D1401H	Exon 19	1.000 (sensitivity: 0.00; specificity: 1.00)	Disease causing; model simple, prob: 0.999	Low	Missense
Jiao et al. 2012 [4]	O III-13	?	IDH pos	47490688G>T			V1474F	Exon 19	0.996 (sensitivity: 0.55; specificity: 0.98)	Disease causing; model simple, prob: 0.999	Low	Missense
Jiao et al. 2012 [4]	O II-12	?	IDH pos	47490903_47490905delAGA			517delK	Exon 20		Disease causing; model simple, prob: 0.999	N.A.	Deletion
Eisenreich et al. 2013	BT 1	1p19q co-deleted (Array CGH)	IDH1 pos (c.395G>A)		chr19:g.(42,790,677_42,790,840)_(42,805,879_42,807,869)del			del Exon 2-20		N.A.	N.A.	Deletion
Eisenreich et al. 2013	BT 2	1p19q co-deleted (Array CGH)	IDH1 pos (c.395G>A)			c.4436A>C	p.(Gln1479Pro)	Exon 19	0.967 (sensitivity: 0.77; specificity: 0.95)	disease causing Model: simple_aae, prob: 0.999933309389114	Low	Missense
Eisenreich et al. 2013	BT 4	1p19q co-deleted (Array CGH)	IDH1 pos (c.395G>A)	chr19:47485172	chr19:42,793,332	c.1135-1G>A		Exon 8(-1 BP)		disease causing Model: without_aae, prob: 0.999999999999999	N.A.	Splice site mutation
Eisenreich et al. 2013	BT 5	1p19q co-deleted (Array CGH)	IDH1 pos (c.395G>A)			c.604C>T	p.(Arg202Trp)	Exon 5	1.000 (sensitivity: 0.00; specificity: 1.00)	disease causing Model: without_aae, prob: 0.999999999743583	N.A.	Missense
Eisenreich et al. 2013	BT 7	1p19q co-deleted (Array CGH)	IDH1 pos (c.395G>A)	chr19:47,488,723-47,488,729	chr19:42,796,883-42,796,889	c.3347dupC	p.(Ser1117Lysfs*34)	Exon 14		disease causing Model: complex_aae, prob: 1	N.A.	Frameshift
Eisenreich et al. 2013	BT 14	1p19q co-deleted (Array CGH)	IDH1 pos (c.395G>A)			c.601C>T	p.(Arg201Trp)	Exon 5	1.000 (sensitivity: 0.00; specificity: 1.00)	disease causing Model: simple_aae, prob: 0.999998820090503	Medium	Missense
Eisenreich et al. 2013	BT 15	1p19q co-deleted (Array CGH)	IDH1 pos (c.395G>A)			c.3131C>A	p.(Ser1044*)	Exon 13		disease causing Model: complex_aae, prob: 1	N.A.	Nonsense
Eisenreich et al. 2013	BT 16	1p19q co-deleted (Array CGH)	IDH1 pos (c.395G>A)			c.4452C>A	p.(Phe1484Leu)	Exon 19	0.965 (sensitivity: 0.78; specificity: 0.95)	disease causing, Model: simple_aae, prob: 0.991287361508088	Low	Missense
Eisenreich et al. 2013	BT 11***	1p19q intact (Array CGH)	IDH1 pos (c.395G>A)			c.3793A>G	p.(Met1265Val)	Exon 15	0.000 (sensitivity: 1.00; specificity: 0.00)	polymorphism Model: simple_aae, prob: 0.999980046468273	Neutral	Missense
Eisenreich et al. 2013	BT 17***	1p19q intact (Array CGH)	IDH1 pos (c.395G>A)			c.1466G>C	p.(Gly489Ala)	Exon 10	0.037 (sensitivity: 0.94; specificity: 0.82)	disease causing Model: simple_aae, prob: 0.958187198990255	Neutral	Missense
TCGA Low Grade Glioma	TCGA-DB-5274	1p19q co-deleted	IDH1 pos (c.395G>A)			?	fs(S891)	Exon 10	N. A.	N.A.	N.A.	Frameshift
TCGA Low Grade Glioma	TCGA-DU-7018	1p19q co-deleted	IDH1 pos (c.395G>A)			?	fs(T144)	Exon 3	N. A.	N.A.	N.A.	Frameshift
TCGA Low Grade Glioma	TCGA-CS-5394	1p19q co-deleted	IDH1 pos (c.395G>A)			?	fs(L1453)	Exon 18	N. A.	N.A.	N.A.	Frameshift
TCGA Low Grade Glioma	TCGA-HT-7616	1p19q co-deleted	IDH1 pos (c.395G>A)			?	Q824*	Exon 10	N. A.	N.A.	N.A.	Nonsense
TCGA Low Grade Glioma	TCGA-DU-7302	1p19q co-deleted	IDH1 pos (c.395G>A)			?	fs(S1351)	Exon 16	N. A.	N.A.	N.A.	Frameshift
TCGA Low Grade Glioma	TCGA-E1-5319	1p19q co-deleted	IDH1 pos (c.395G>A)			?	fs(T1121)	Exon 14	N. A.	N.A.	N.A.	Frameshift
TCGA Low Grade Glioma	TCGA-DH-5141	1p19q co-deleted	IDH2 pos			?	fs(S1221)	Exon 15	N. A.	N.A.	N.A.	Frameshift
TCGA Low Grade Glioma	TCGA-E1-5318	1p19q co-deleted	IDH2 pos			?	fs(A774)	Exon 10	N. A.	N.A.	N.A.	Frameshift
TCGA Low Grade Glioma	TCGA-HT-7608	1p19q co-deleted	IDH1 pos (c.395G>A)			?	fs(K275)	Exon 6	N. A.	N.A.	N.A.	Frameshift
TCGA Low Grade Glioma	TCGA-DU-7294	1p19q co-deleted	IDH1 pos (c.395G>A)			?	L234Q	Exon 5	1.000 (sensitivity: 0.00; specificity: 1.00)	N.A.	High	Missense
TCGA Low Grade Glioma	TCGA-HT-7468	1p19q co-deleted	IDH1 pos (c.395G>A)			?	R215W	Exon 5	1.000 (sensitivity: 0.00; specificity: 1.00)	N.A.	Medium	Missense
TCGA Low Grade Glioma	TCGA-DU-6393	1p19q co-deleted	IDH1 pos (c.395G>A)			?	fs(T990)	Exon 12	N.A.	N.A.	N.A.	Frameshift
TCGA Low Grade Glioma	TCGA-IK-8125	1p19q intact	IDH1 pos (c.395G>A)			?	fs(K1268)	Exon 15	N.A.	N.A.	N.A.	Frameshift
TCGA Low Grade Glioma	TCGA-CS-6668	1p19q co-deleted	IDH1 pos (c.395G>A)			?	fs(P718)	Exon 10	N.A.	N.A.	N.A.	Frameshift
TCGA Low Grade Glioma	TCGA-DU-5870	1p19q co-deleted	IDH1 pos (c.395G>A)			?	R215W	Exon 5	1.000 (sensitivity: 0.00; specificity: 1.00)	N.A.	Medium	Missense
TCGA Low Grade Glioma	TCGA-HT-7875	1p19q co-deleted	IDH1 pos (c.395G>A)			?	Q994*	Exon 12	N.A.	N.A.	N.A.	Nonsense
TCGA Low Grade Glioma	TCGA-FG-7638	1p19q co-deleted	IDH1 pos (c.395G>A)			?	R215W	Exon 5	1.000 (sensitivity: 0.00; specificity: 1.00)	N.A.	Medium	Missense
TCGA Low Grade Glioma	TCGA-HT-7471	1p19q co-deleted	IDH1 pos (c.395G>A)			?	fs(P497)	Exon 9	N.A.	N.A.	N.A.	Frameshift
TCGA Low Grade Glioma	TCGA-E1-5311	1p19q co-deleted	IDH1 pos (c.395G>A)			?	R202W	Exon 5	1.000 (sensitivity: 0.00; specificity: 1.00)	N.A.	High	Missense
TCGA Low Grade Glioma	TCGA-DU-6400	1p19q co-deleted	IDH1 pos (c.395G>A)			?	P203S	Exon 5	1.000 (sensitivity: 0.00; specificity: 1.00)	N.A.	Medium	Missense
TCGA Low Grade Glioma	TCGA-DU-6400	1p19q co-deleted	IDH1 pos (c.395G>A)			?	Y395fs	Exon 8	1.000 (sensitivity: 0.00; specificity: 1.00)	N.A.	N.A.	Frameshift
TCGA Low Grade Glioma	TCGA-DU-8168	1p19q co-deleted	IDH1 pos (c.395G>A)			?	fs(S891)	Exon 10	N.A.	N.A.	N.A.	Frameshift
TCGA Low Grade Glioma	TCGA-HT-8012	1p19q co-deleted	IDH1 pos (c.395G>A)			?	fs(D369)	Exon 7	N.A.	N.A.	N.A.	Frameshift
TCGA Low Grade Glioma	TCGA-HT-8012	1p19q co-deleted	IDH1 pos (c.395G>A)			?	fs(T89)	Exon 3	N.A.	N.A.	N.A.	Frameshift
TCGA Low Grade Glioma	TCGA-EZ-7264	1p19q co-deleted	IDH1 pos (c.395G>A)			?	F1484V	Exon 19	0.985 (sensitivity: 0.74; specificity: 0.96)	N.A.	Low	Missense
TCGA Low Grade Glioma	TCGA-HT-7681	1p19q co-deleted	IDH2 pos			?	R215W	Exon 5	1.000 (sensitivity: 0.00; specificity: 1.00)	N.A.	Medium	Missense
TCGA Low Grade Glioma	TCGA-HT-7480	1p19q co-deleted	IDH1 pos (c.395G>A)			?	R1003_splice	Exon 12	N.A.	N.A.	N.A.	Splice site mutation
TCGA Low Grade Glioma	TCGA-DB-5278	1p19q co-deleted	IDH1 pos (c.395G>A)			?	F210C	Exon 5	1.000 (sensitivity: 0.00; specificity: 1.00)	N.A.	High	Missense
TCGA Low Grade Glioma	TCGA-HW-7491	1p19q co-deleted	IDH2 pos			?	R215W	Exon 5	1.000 (sensitivity: 0.00; specificity: 1.00)	N.A.	Medium	Missense
TCGA Low Grade Glioma	TCGA-DH-5144	1p19q co-deleted	IDH1 pos (c.395G>A)			?	R1515C	Exon 20	1.000 (sensitivity: 0.00; specificity: 1.00)	N.A.	Low	Missense
TCGA Low Grade Glioma	TCGA-HT-7695	1p19q co-deleted	IDH1 pos (c.395G>A)			?	R1471Q	Exon 19	0.998 (sensitivity: 0.27; specificity: 0.99)	N.A.	Low	Missense
TCGA Low Grade Glioma	TCGA-HW-7487	1p19q co-deleted	IDH1 pos (c.395G>A)			?	R215Q	Exon 5	1.000 (sensitivity: 0.00; specificity: 1.00)	N.A.	Medium	Missense
TCGA Low Grade Glioma	TCGA-FG-5964	1p19q co-deleted	IDH1 pos (c.395G>A)			?	fs(S1344)	Exon 17	N.A.	N.A.	N.A.	Frameshift
TCGA Low Grade Glioma	TCGA-HT-7694	1p19q co-deleted	IDH1 pos (c.395G>A)			?	fs(R415)	Exon 8	N.A.	N.A.	N.A.	Frameshift
TCGA Low Grade Glioma	TCGA-HT-8105	1p19q co-deleted	IDH1 pos (c.395G>A)			?	fs(L664)	Exon 10	N.A.	N.A.	N.A.	Frameshift
TCGA Low Grade Glioma	TCGA-HT-7677	1p19q co-deleted	IDH1 pos (c.395G>A)			?	R1512L	Exon 20	0.995 (sensitivity: 0.68; specificity: 0.97)	N.A.	Low	Missense
TCGA Low Grade Glioma	TCGA-FG-7634	1p19q co-deleted	IDH1 pos (c.395G>A)			?	R1471Q	Exon 19	0.998 (sensitivity: 0.27; specificity: 0.99)	N.A.	Low	Missense
TCGA Low Grade Glioma	TCGA-DU-6392***	1p19q intact	wt			?	R1321H	Exon 16	0.037 (sensitivity: 0.94; specificity: 0.82)	N.A.	Neutral	Missense
TCGA Low Grade Glioma	TCGA-DU-6392***	1p19q intact	wt			?	V1189M	Exon 15	1.000 (sensitivity: 0.00; specificity: 1.00)	N.A.	Neutral	Missense
* Tumor Histology: Gliomatosis Cerebri
** only two tumor samples harboring a missense mutation with high Polyphen-Score (>0.947) located outside of the HMG-Box (Exon 5/beginning of 6)or GlobDom (Exon 18-20)
*** Tumor samples harboring missense mutations with low Polyphen-Score (<0.088) assumed to be potential polymorphisms and not disease causing
1. Bettegowda C, Agrawal N, Jiao Y, et al. (2011) Mutations in CIC and FUBP1 contribute to human oligodendroglioma. Science (New York, NY) 333 (6048):1453-1455. doi:10.1126/science.1210557
2. Yip S, Butterfield YS, Morozova O, et al. (2012) Concurrent CIC mutations, IDH mutations, and 1p/19q loss distinguish oligodendrogliomas from other cancers. The Journal of pathology 226 (1):7-16. doi:10.1002/path.2995; 10.1002/path.2995
3. Sahm F, Koelsche C, Meyer J, et al. (2012) CIC and FUBP1 mutations in oligodendrogliomas, oligoastrocytomas and astrocytomas. Acta Neuropathologica 123 (6):853-860. doi:10.1007/s00401-012-0993-5
4. Jiao Y, Killela PJ, Reitman ZJ,et al. (2012) Frequent ATRX, CIC, and FUBP1 mutations refine the classification of malignant gliomas. Oncotarget 3 (7):709-722
5. TCGA dataset: cBioPortal for Cancer Genomics of the Memorial Sloan-Kettering Cancer Center (http://www.cbioportal.org)
